# Supplementary material for: Prebiotic diet changes neural correlates of food decision-making in overweight adults: a randomised controlled within-subject cross-over trial
Source: PubMed Central journal article supplement — Gut. 2023 Oct 4;73(2):298–310. doi: 10.1136/gutjnl-2023-330365 (PMC10850731; doi:10.1136/gutjnl-2023-330365), 2023-10-04

Bivariate correlations of change scores after prebiotics. R-values are written if corresponding p < 0.05

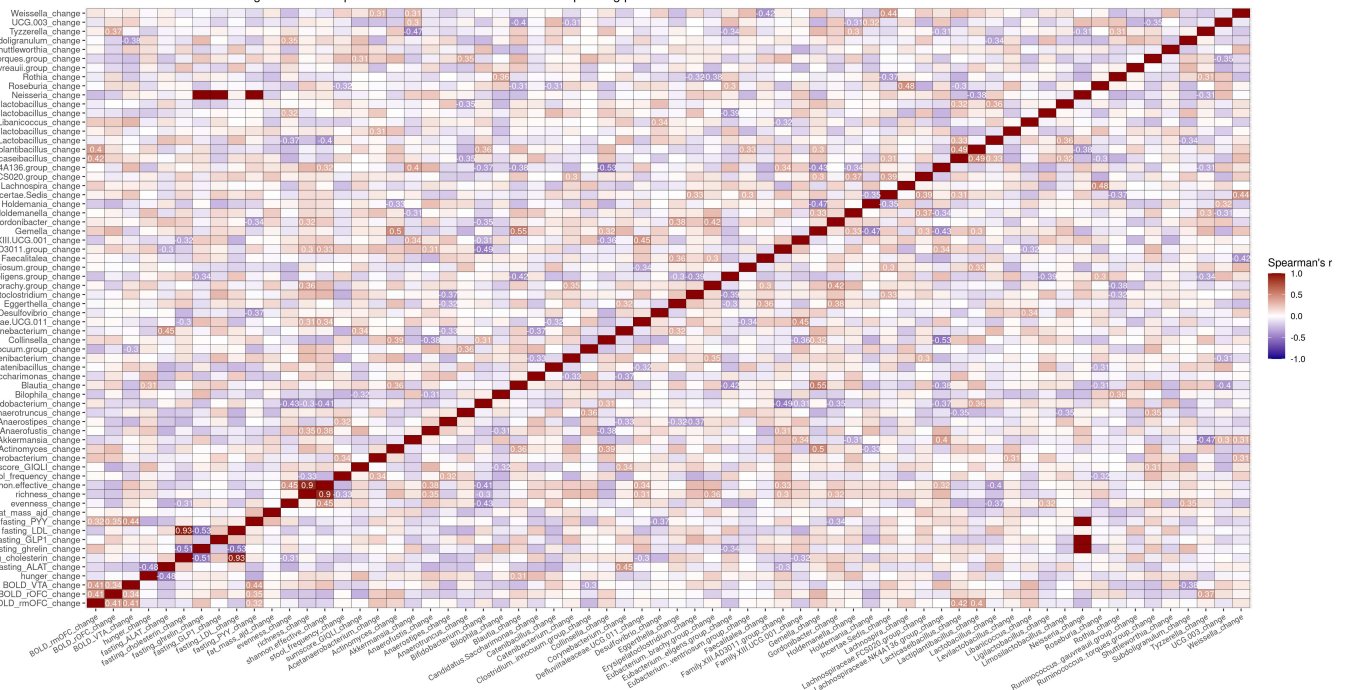

Supplement: gutjnl-2023-330365supp005.pdf [file gutjnl-2023-330365supp005.pdf]
